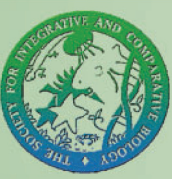

## GENOMICS PAPER

# Warming Accelerates the Onset of the Molecular Stress Response and Increases Mortality of Larval Atlantic Cod

Rebekah A. Oomen <sup>\*,†,‡,§,¶</sup>, Halvor Knutsen<sup>†,‡</sup>, Esben M. Olsen<sup>†,‡</sup>, Sissel Jentoft<sup>\*</sup>, Nils Chr. Stenseth<sup>\*†</sup> and Jeffrey A. Hutchings<sup>†,‡,§</sup>

\*Centre for Ecological and Evolutionary Synthesis (CEES), Department of Biosciences, University of Oslo, 0371 Oslo, Norway; <sup>†</sup>Center for Coastal Research (CCR), Department of Natural Sciences, University of Agder, 4604 Kristiansand, Norway; <sup>‡</sup>Institute of Marine Research, Nye Flødevigveien 20, 4817 His, Norway; <sup>§</sup>Department of Biology, Dalhousie University, Halifax, NS B3H 4J1, Canada

Sadly, the co-author Jeffrey A. Hutchings died prior to submission of a revised version of this manuscript. He is deeply missed.

<sup>¶</sup>E-mail: [rebekahoomen@gmail.com](mailto:rebekahoomen@gmail.com)

**Synopsis** Temperature profoundly affects ectotherm physiology. Although differential thermal responses influence fitness, thus driving population dynamics and species distributions, our understanding of the molecular architecture underlying these responses is limited, especially during the critical larval stage. Here, using RNA-sequencing of laboratory-reared Atlantic cod (*Gadus morhua*) larvae of wild origin, we find changes in gene expression in thousands of transcripts consistent with a severe cellular stress response at both ambient and projected (+2°C and +4°C) temperatures. In addition, specific responses to stress, heat, and hypoxia were commonly identified in gene ontology enrichment analyses and 33 of the 44 genes comprising the minimum stress proteome of all organisms were upregulated. Earlier onset of the stress response was evident at higher temperatures; concomitant increased growth and mortality suggests a reduction in fitness. Temporal differences in gene expression levels do not correspond to differences in growing degree days, suggesting negative physiological consequences of warming beyond accelerated development. Because gene expression is costly, we infer that the upregulation of thousands of transcripts in response to warming in larval cod might act as an energetic drain. We hypothesize that the energetically costly stress response, coupled with increased growth rate at warmer temperatures, leads to faster depletion of energy reserves and increased risk of mortality in larval cod. As sea surface temperatures continue to rise over the next century, reduced fitness of Atlantic cod larvae might lead to population declines in this ecologically and socioeconomically important species. Further, our findings expand our understanding of transcriptomic responses to temperature by ectothermic vertebrate larvae beyond the critical first-feeding stage, a time when organisms begin balancing the energetic demands of growth, foraging, development, and maintenance. Linking the molecular basis of a thermal response to key fitness-related traits is fundamentally important to predicting how global warming will affect ectotherms.

## Introduction

Temperature has profound effects on ectotherm physiology, impacting metabolic and developmental rates (Clarke and Fraser 2004), aerobic scope (Clark et al. 2013), and inducing cellular stress responses (Schulte 2014). The resulting phenotypic and fitness consequences ultimately drive population dynamics and species distributions (Pörtner 2002; Schulte et al. 2011). Despite clear links to individual fitness and population

viability, the molecular mechanisms underlying thermal plasticity are poorly understood (Logan and Buckley 2015; Oomen and Hutchings 2017). This is especially true of early life stages, which encompass critical periods for survival and development and are particularly sensitive to temperature (Pörtner and Farrell 2008). Ectothermic larvae typically tolerate a narrower range of temperatures than later life stages and these tolerances often more accurately reflect the climatic

Advance Access publication September 21, 2022

© The Author(s) 2022. Published by Oxford University Press on behalf of the Society for Integrative and Comparative Biology. This is an Open Access article distributed under the terms of the Creative Commons Attribution License (<https://creativecommons.org/licenses/by/4.0/>), which permits unrestricted reuse, distribution, and reproduction in any medium, provided the original work is properly cited.

boundaries within which species successfully colonize (Abele 2012). Further, the influence of temperature during development has consequences for thermal tolerances and acclimation capacities later in life (Scott and Johnston 2012). Thus, understanding the effects of temperature during early development at the molecular level is critical for determining the physiological limitations of ectotherms and predicting their individual and population responses to global climate change.

Most investigations of responses to thermal extremes at the molecular level have narrowly focused on heat shock proteins (Chen et al. 2018). Advances in transcriptomics of non-model species (i.e., those which lack genomic tools and resources) have broadened the interpretation of thermal responses beyond the heat shock response to the highly complex genome-wide suite of processes that affect an organism's performance near the edges of their thermal range (Logan and Buckley 2015; Kingsolver and Woods 2016). While energetically costly heat shock proteins have been shown to improve short-term survival, sustained overexpression can have trade-offs, reducing the energy available for growth, development, and reproduction (Tomanek 2010). Therefore, the extent and duration of gene and protein expression in response to sub-lethal thermal stress, and associated fitness consequences, can have profound impacts on ectotherm populations experiencing climate warming (Kingsolver and Woods 2016).

Knowledge of how the transcriptomic thermal response impacts and interacts with growth and development of ectotherms in early life is limited; most studies have been undertaken on juveniles and adults (Moyano et al. 2017). Among transcriptomic studies of early life-stage thermal plasticity in ectothermic vertebrates, few have extended beyond the stage of first feeding, the critical point at which organisms must begin to balance the energetic demands of foraging, growth, development, and maintenance. Microarray studies investigating responses to warming in (pre-feeding) fish larvae have had limited time points ( $n = 2$ ) and do not link variation in gene expression to survival (Long et al. 2012; Meier et al. 2014), despite fitness measures being critical to the interpretation of how thermal responses affect individuals and populations.

Nonetheless, these studies have revealed dysregulation of thousands of genes in response to temperature increases of 3°C (Meier et al. 2014) and 6°C (Long et al. 2012). For example, in a study of larval zebrafish (*Danio rerio*) 96 h post-fertilization, differential expression of 2860 temperature-responsive genes was coupled with inhibitory effects of thermal extremes on larval development (Long et al. 2012). Seemingly contrary evidence from the invertebrate realm suggests that 2°C of warming accelerates normal developmental transcrip-

tion patterns in larvae of the coral *Acropora palmata*, although the fitness implications are unclear (Polato et al. 2013).

We hypothesize that small temperature increases concordant with those predicted to occur over the next century (IPCC 2013) are likely to cause vast shifts in gene expression, associated fitness and, consequently, population viability. Here, we use RNA-sequencing to investigate the effects of ambient and projected global shifts in temperature (+2°C and +4°C) on genome-wide expression patterns during early development of Atlantic cod (*Gadus morhua*), a widely distributed marine eurytherm with a thermally and developmentally sensitive pelagic larval phase. A comprehensive experimental design, comprising several temperatures and time points (beyond the critical stage of first feeding), allows us to characterize the transcriptomic response to warming in larval fish and evaluate the relationship between the thermal response and developmental time. Further, we quantify growth and survival reaction norms to understand the fitness implications of the transcriptomic response. In doing so, the present study contributes to our understanding of the physiological limitations of ectotherms during early life and provides a resource for functional studies of temperature-responsive genes during early development.

## Materials and methods

### Experimental design

We conducted RNA sequencing of larval Atlantic cod that were reared at three temperatures in the laboratory to assess variation in gene expression, growth, and survival with temperature over time (Fig. 1). Sixty-six adult Atlantic cod were collected near the *Institute of Marine Research, Flødevigen* on the Norwegian Skagerrak coast (58.39603N, 8.73322E) in December 2012. All cod were allowed to spawn undisturbed in a 45 m<sup>3</sup> spawning basin at the *Institute of Marine Research, Flødevigen*, from February to May 2013. Cod were held at ambient temperature and photoperiod and fed shrimp daily until the end of the spawning period, when they were sacrificed by a blow to the head prior to dissection for sex identification and fin tissue collection.

Midway through the spawning season, fertilized eggs were collected and incubated at 9°C in a 900 L flow-through seawater tank until hatch, when they were randomly distributed among 40 L rearing tanks with flow-rates of 0.35 L/min (i.e., ~2 h turnover rate). Larvae were reared at three temperatures (9°C, 11°C, and 13°C) with three replicate tanks per temperature initially containing 1600 larvae each (Fig. 1). These temperatures represent the ambient seawater temperature outside the

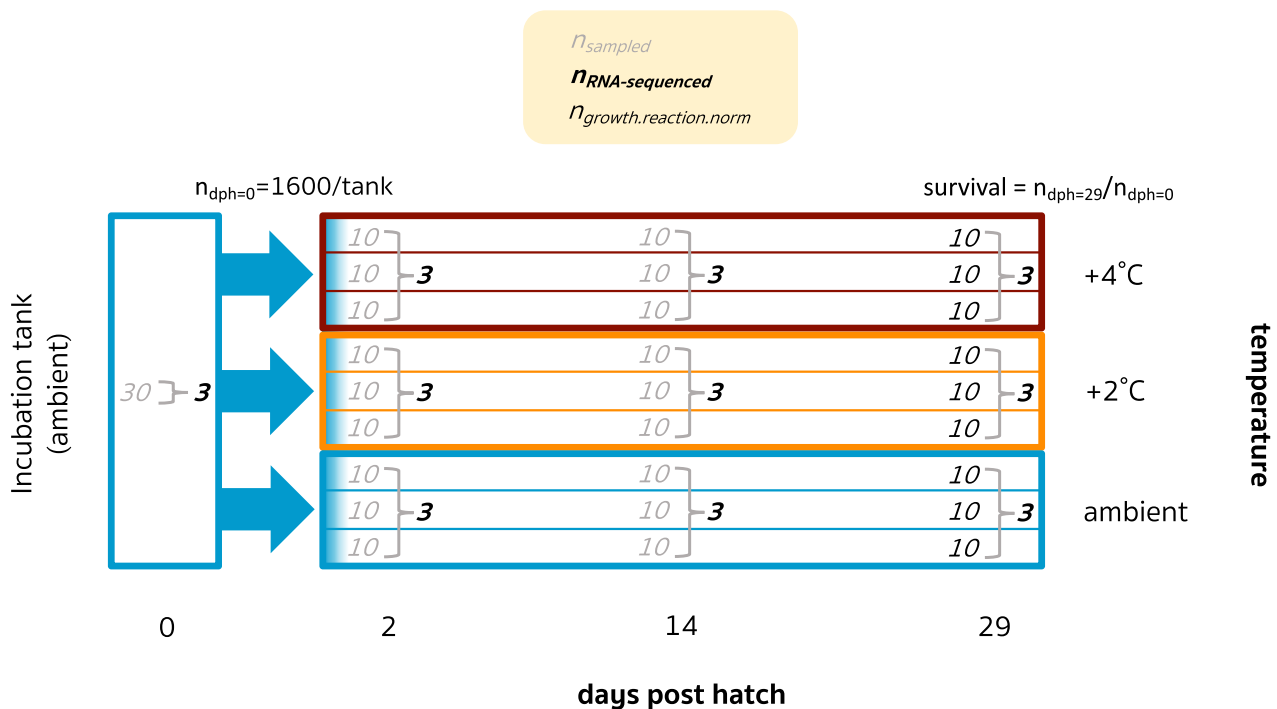

**Fig. 1** Experimental design. Newly hatched larvae were transferred to independent experimental tanks assigned to three temperatures with three replicate tanks per temperature and reared for 29 days post hatch. The ambient temperature was 9°C. The number of larvae sampled from each tank and, of these, RNA-sequenced and used for the growth reaction norm analysis is shown.

Flødevigen facility, in the vicinity where the adult cod were collected, and a 2°C and 4°C increase representing projected climate scenarios by the year 2100 (IPCC 2013). The temperatures in the rearing tanks were 9°C upon transfer from the incubation tank and then gradually changed to the experimental temperatures over the course of 24 h. Larvae were reared under a constant light intensity of 2000 lux and fed *Brachionus plicatilis* rotifers enriched with RotiGrow Plus™ (Reed Mariculture, USA) in excess (4500 prey/L three times daily, at approximately 10:00 am, 2:00 pm, and 6:00 pm). Water temperatures were recorded daily and water quality parameters (oxygen, pH, and ammonia concentration) were monitored with no notable deviations.

Ten larvae from each of the nine tanks were randomly sampled at 2, 14, and 29 dph, and an additional 30 larvae were sampled from the hatching tank at 0 dph (Fig. 1). Larvae were individually placed in RNAlater™ (an ammonium sulphate solution) on a glass slide and immediately photographed, using a stereoscope with a Leica DFC 425 C Camera. Samples were preserved in RNAlater™ at -20°C prior to DNA and RNA extraction.

Standard length at 29 dph was measured from the photographs, using ImageJ (Abramoff et al. 2004), and considered a proxy for growth rate, following Hutchings et al. (2007). Survival was quantified as the number of larvae alive in each tank at 29 dph relative to the number initially in each tank. This count was obtained prior

to that day's sampling, but was not otherwise adjusted for sampling mortality.

After 29 dph, the larvae continued to be reared with a change in feed: a 1:1 mixture of rotifers and *Artemia* from 32–39 dph and *Artemia* only from 40–43 dph. Survival was measured again at 43 dph to assess the consistency of temperature effects over time, beyond the end of the larval stage. Gene expression was not measured beyond 29 dph due to the confounding effect of different feed types with size and temperature; therefore, we refer to day 29 as the end of the experiment.

### DNA/RNA isolation

Of the sampled larvae, 30 were selected for RNA-seq: three from each of the three temperature treatments and three time points, plus three samples from the hatching tank (0 dph) to serve as a baseline (Fig. 1; see Supplementary Table S3 for details). Samples were selected from two of the tank replicates, which were considered to be biological replicates given the lack of phenotypic variation among tanks (random effect  $\sigma^2 = 0$  in the growth model). Larvae were dissected into proximal (including the head, organs, and part of the tail) and distal (the remainder of the tail) sections, which were used for RNA and DNA isolations, respectively. DNA was extracted from adult and larval tissue, using the E-Z 96 Tissue DNA Kit (Omega Bio-tek) in accordance with

the manufacturer's instructions. Parentage analysis using methods described by Roney et al. (2018) identified three full-sib/two half-sib families derived from two fathers and three mothers, with 90% of offspring coming from the same parent pair (Table S3).

### RNA isolation, sequencing, and assembly

For each larva, total RNA was isolated using the RNeasy Mini Kit (Qiagen) according to the manufacturer's instructions with the following specifications. Tissue homogenization was carried out using a Fastprep-24 Instrument (MP Biomedicals) for 30 s at 4.0 M/S in 1.5 mL tubes containing ceramic beads and 250  $\mu$ L 1x lysis buffer. RNA was eluted in two steps using 25  $\mu$ L of RNase-free water each. Quality of RNA isolates was evaluated using an Agilent 2100 Bioanalyzer (BioRad) before and after library preparation with the TruSeq<sup>TM</sup> RNA low-throughput protocol (Illumina) and a fragmentation time of 4 min.

Libraries were sequenced with a 100 bp paired-end (PE) protocol on the Illumina HiSeq 2500 platform at the Norwegian Sequencing Centre ([www.sequencing.uio.no](http://www.sequencing.uio.no)), producing a total of 798 million read pairs. Trimming and adapter removal were performed on all sequences (Oomen et al. 2022), reducing the dataset to 740 million read pairs. Transcriptome assembly was performed *de novo* using the Trinity software suite v.2014-07-17 (<http://trinityrnaseq.github.io>) and annotated using Trinotate v.2.0.1 (<https://trinotate.github.io>). See Oomen et al. (2022) for assembly details and comparisons of the *de novo* assembly and reference genome-based assemblies.

### Differential expression statistical analysis

Differential expression analysis was carried out using edgeR v.3.16.5 (Robinson et al. 2010) in R v.3.3.2 (R Core Team 2014). We filtered transcripts that did not have a count per million (CPM) >1 in at least three samples. Pairwise comparisons were then carried out between all samples compared to the baseline sample, as well as across time within temperatures, and across temperatures within times, using a false discovery rate (FDR)-corrected *P*-value of 0.05. Venn diagrams were constructed using BioVenn (Hulsen et al. 2008) and Venny (<http://bioinfogp.cnb.csic.es/tools/venny/>) to compare differentially expressed gene lists among pairwise comparisons.

### Gene ontology enrichment analysis

GO enrichment analysis and network construction were performed using ClueGO v.2.3.2 (Bindea et al. 2009) and BiNGO v.3.0.3 (Maere et al. 2005) in Cy-

toscape v.3.2.1 (Shannon et al. 2003) to identify significantly enriched biological processes involved in the thermal response. Annotations were compared to a human (in ClueGO) or custom (i.e., constructed from the Blastx hits from Trinotate; in BiNGO) gene ontology database. Up- and down-regulated genes were analyzed separately for both analyses and only the GO category "Biological Processes" was analyzed as we considered it to be the most phenotypically informative. The Gene Fusion option was used in ClueGO to enhance clustering. GO terms identified by ClueGO were clustered into medium-specificity upper-level GO categories using a kappa-scoring algorithm based on gene membership similarity. Upper-level clustering in ClueGO facilitates interpretations of large numbers of enriched GO terms for those genes with annotations (in the form of gene names) that match the human database, while the custom GO database implemented in BiNGO identifies enriched processes using all available GO annotations (in the form of a numerical GO ID). An FDR-corrected *P*-value of 0.05 and otherwise default parameters were used for both analyses.

### Downstream analysis of *de novo*-assembled transcripts

Due to the ability to annotate novel loci and an apparently greater sensitivity for detecting likely biologically meaningful differential expression in our experiment (e.g., greater average GO enrichment relative to the numbers of differentially expressed genes), we chose a *de novo* assembly approach (Oomen et al. 2022). The numbers and log-fold changes of genes that were differentially expressed when compared to the baseline were evaluated relative to developmental time using the growing degree day metric, which is the sum of daily temperatures measured above a temperature threshold (in this case 0°C) that accounts for the relationship between temperature and rates of enzymatic reactions (Neuheimer and Taggart 2007). We performed a post-hoc evaluation for the presence of the minimum stress proteome (a set of 44 universally conserved stress proteins; Kültz 2005) in our experiment by manually searching the transcriptome annotations for gene descriptions corresponding to those contained in Kültz (2005) Table 1 and observing whether these transcripts were differentially expressed relative to the baseline.

### Growth and survival statistical analysis

The effect of temperature on growth was evaluated in R v.3.3.2 (R Core Team), using a linear mixed-effects model with temperature as a fixed effect and tank nested within temperature as a random effect. Survival was modeled in relation to temperature as a fixed effect, us-

**Table 1** Transcripts annotated to genes that comprise part of the minimum stress proteome that were differentially expressed (FDR >0.05) relative to the baseline in larval Atlantic cod reared at three temperatures.

| Transcript ID               | Gene name | Description                                                                           | Min. E value | D2-13°C | D14-9°C | D14-11°C | D14-13°C | D29-9°C | D29-11°C | D29-13°C |
|-----------------------------|-----------|---------------------------------------------------------------------------------------|--------------|---------|---------|----------|----------|---------|----------|----------|
| DNA damage sensing/repair   |           |                                                                                       |              |         |         |          |          |         |          |          |
| c79008_g1                   | MLH1      | DNA mismatch repair protein MLH1                                                      | 1.00E-126    |         | 6.62    |          |          | 5.07    |          |          |
| c139074_g1                  | MSH6      | DNA mismatch repair protein Msh6                                                      | 0            | 5.96    | 8.08    |          |          | 6.47    |          |          |
| c143511_g1                  | MSH2      | DNA mismatch repair protein Msh2                                                      | 0            | 6.28    | 8.18    |          |          | 7.15    |          |          |
| c79247_g1                   | RA51A     | DNA repair protein RAD51 homolog A                                                    | 0            | 5.54    | 8.31    |          |          | 6.53    |          |          |
| c141131_g1                  | TOPI      | DNA topoisomerase I                                                                   | 0            | 6.67    | 9.58    |          |          | 9.07    |          |          |
| c185971_g1                  | TOP3A     | DNA topoisomerase 3-alpha                                                             | 0            | 4.75    | 6.21    |          |          | 4.93    |          |          |
| Energy metabolism           |           |                                                                                       |              |         |         |          |          |         |          |          |
| c136064_g1                  | AT2C1     | Calcium-transporting ATPase type 2C member 1                                          | 0            | 5.58    | 6.72    |          |          | 5.42    |          |          |
| c145796_g2                  | AT2B1     | Plasma membrane calcium-transporting ATPase 1                                         | 6.00E-42     |         |         |          |          |         | -1.47    |          |
| c150107_g1                  | AT2B3     | Plasma membrane calcium-transporting ATPase 3                                         | 0            | 6.98    | 8.17    |          |          | 7.01    |          |          |
| c153430_g1                  | AT2A1     | Sarcoplasmic/endoplasmic reticulum calcium ATPase 1                                   | 2.00E-54     |         | -1.18   |          |          |         |          |          |
| c153430_g4                  | ATC       | Calcium-transporting ATPase                                                           | 3.00E-54     | 6.48    | 6.72    |          |          | 5.70    |          |          |
| c153660_g13                 | AT2B3     | sarcoplasmic/endoplasmic reticulum type Plasma membrane calcium-transporting ATPase 3 | 1.00E-147    |         |         |          |          |         |          | -1.36    |
| c155386_g2                  | AT2B1     | Plasma membrane calcium-transporting ATPase 1                                         | 0            | 7.47    | 8.61    |          |          | 7.73    |          |          |
| c157062_g2                  | AT2A1     | Sarcoplasmic/endoplasmic reticulum calcium ATPase 1                                   | 2.00E-98     |         | -0.98   |          |          |         |          |          |
| c158484_g6                  | AT2A1     | Sarcoplasmic/endoplasmic reticulum calcium ATPase 1                                   | 4.00E-174    |         | -1.18   |          |          |         |          |          |
| c160449_g5                  | AT2A1     | Sarcoplasmic/endoplasmic reticulum calcium ATPase 1                                   | 6.00E-64     |         | -1.25   |          |          |         |          |          |
| c130005_g1                  | CISY      | Citrate synthase                                                                      | 0            | 8.57    | 9.89    |          |          | 7.85    |          |          |
| c149079_g1                  | ACLY      | ATP-citrate synthase                                                                  | 0            | 7.83    | 9.41    |          |          | 6.47    |          |          |
| c159927_g2                  | ACLY      | ATP-citrate synthase                                                                  | 0            |         |         |          |          | -0.96   |          | -1.17    |
| c141763_g1                  | ENOA      | Alpha-enolase                                                                         | 0            | 9.59    | 10.59   |          |          | 9.19    |          |          |
| c140798_g1                  | PGM2      | Phosphoglucomutase-2                                                                  | 0            | 5.85    | 7.94    |          |          | 6.00    |          |          |
| c141603_g1                  | PGM5      | Phosphoglucomutase-like protein 5                                                     | 9.00E-61     |         |         |          |          | -1.64   |          |          |
| c263700_g1                  | PGM1      | Phosphoglucomutase-1                                                                  | 0            | 7.64    | 8.28    |          |          |         |          |          |
| Fatty acid/lipid metabolism |           |                                                                                       |              |         |         |          |          |         |          |          |
| c133422_g2                  | PATL1     | Protein PAT1 homolog 1                                                                | 5.00E-24     | 4.97    | 7.13    |          |          | 5.44    |          |          |
| c110543_g1                  | ACSL4     | Long-chain-fatty-acid-CoA ligase 4                                                    | 4.00E-142    |         | 6.59    |          |          | 5.30    |          |          |
| c129849_g1                  | ACSL5     | Long-chain-fatty-acid-CoA ligase 5                                                    | 0            | 5.68    | 6.68    |          |          |         |          |          |
| c134376_g1                  | ACSL1     | Long-chain-fatty-acid-CoA ligase 1                                                    | 0            | 5.61    | 6.99    |          |          |         |          |          |

Table 1 Continued

| Transcript ID        | Gene name | Description                                                         | Min. E value | D2-13°C | D14-9°C | D14-11°C | D14-13°C | D29-9°C | D29-11°C | D29-13°C |
|----------------------|-----------|---------------------------------------------------------------------|--------------|---------|---------|----------|----------|---------|----------|----------|
| c143921_g1           | ACSL3     | Long-chain-fatty-acid-CoA ligase 3                                  | 0            | 6.99    |         | 8.46     |          | 6.98    |          |          |
| c79025_g1            | DHB4      | Peroxisomal multifunctional enzyme type 2                           | 0            | 6.74    |         | 8.04     |          | 6.19    |          |          |
| Molecular chaperones |           |                                                                     |              |         |         |          |          |         |          |          |
| c101741_g1           | DJCI1     | Dnaj homolog subfamily C member 11                                  | 4.00E-115    | 5.58    |         | 6.75     |          |         |          |          |
| c106402_g1           | DNJB2     | Dnaj homolog subfamily B member 2                                   | 4.00E-34     | 5.73    |         | 7.06     |          | 5.32    |          |          |
| c111354_g1           | DNJC5     | Dnaj homolog subfamily C member 5                                   | 1.00E-27     | 5.27    |         | 6.16     |          |         |          |          |
| c116500_g1           | DNJC2     | Dnaj homolog subfamily C member 2                                   | 2.00E-64     | 6.08    |         | 7.61     |          | 5.89    |          |          |
| c118111_g1           | DNAJ1     | Dnaj protein homolog 1                                              | 4.00E-103    | 6.80    |         | 8.79     |          | 6.93    |          |          |
| c118596_g1           | DJB11     | Dnaj homolog subfamily B member 11                                  | 1.00E-151    | 6.08    |         | 8.17     |          | 7.07    |          |          |
| c120618_g1           | DNJC7     | Dnaj homolog subfamily C member 7                                   | 6.00E-136    | 6.28    |         | 7.94     |          | 6.01    |          |          |
| c122274_g1           | DNJA1     | Dnaj homolog subfamily A member 1                                   | 6.00E-150    | 7.35    |         | 8.70     |          | 7.46    |          |          |
| c123966_g1           | DNJC3     | Dnaj homolog subfamily C member 3                                   | 2.00E-121    | 5.62    |         | 7.76     |          | 5.80    |          |          |
| c125071_g1           | DNJC9     | Dnaj homolog subfamily C member 9                                   | 1.00E-46     | 5.43    |         | 8.83     |          | 7.22    |          |          |
| c136250_g1           | DJB12     | Dnaj homolog subfamily B member 12                                  | 1.00E-72     | 5.68    |         | 7.07     |          | 6.02    |          |          |
| c137180_g1           | DJC16     | Dnaj homolog subfamily C member 16                                  | 1.00E-54     | 5.36    |         | 6.99     |          | 5.04    |          |          |
| c141320_g1           | DJC10     | Dnaj homolog subfamily C member 10                                  | 0            | 5.33    |         | 6.87     |          | 6.60    |          |          |
| c144998_g2           | DJC27     | Dnaj homolog subfamily C member 27                                  | 0            |         |         |          |          | -0.81   |          |          |
| c149091_g2           | DNJC4     | Dnaj homolog subfamily C member 4                                   | 6.00E-53     |         |         | 1.08     |          |         |          |          |
| c149153_g5           | DNJC5     | Dnaj homolog subfamily C member 5                                   | 2.00E-98     |         |         | -0.71    |          |         |          |          |
| c53913_g1            | DNJA2     | Dnaj homolog subfamily A member 2                                   | 5.00E-104    | 7.17    |         | 9.01     |          | 6.71    |          |          |
| c79127_g1            | DNJB2     | Dnaj homolog subfamily B member 2                                   | 4.00E-41     | 4.87    |         | 7.99     |          | 6.39    |          |          |
| c138398_g2           | HSP70     | Heat shock 70 kDa protein                                           | 6.00E-101    |         |         |          |          |         | 2.02     |          |
| c158105_g1           | HSP70     | Heat shock 70 kDa protein                                           | 8.00E-50     |         |         | 3.90     | 3.91     | 3.38    |          |          |
| c159822_g1           | HSP70     | Heat shock 70 kDa protein                                           | 3.00E-70     |         |         | 3.33     |          |         |          |          |
| c160682_g2           | HSP70     | Heat shock 70 kDa protein                                           | 1.00E-142    |         |         | 3.17     |          |         |          |          |
| c237034_g1           | GRPE1     | GrpE protein homolog 1                                              | 2.00E-44     | 5.87    |         | 6.79     |          |         |          |          |
| c144731_g1           | PPWD1     | Peptidylprolyl isomerase domain and VWD repeat-containing protein 1 | 0            |         |         | 7.14     |          | 6.24    |          |          |
| Other functions      |           |                                                                     |              |         |         |          |          |         |          |          |
| c128565_g1           | IMPA1     | Inositol monophosphatase 1                                          | 1.00E-123    |         |         | -2.01    |          |         |          | -1.84    |
| c138690_g1           | IMPA3     | Inositol monophosphatase 3                                          | 3.00E-47     | 4.94    |         | 6.94     |          | 5.96    |          |          |
| c143207_g1           | IMPA1     | Inositol monophosphatase 1                                          | 5.00E-143    |         | 2.32    | 2.96     | 2.32     | 2.90    | 3.10     | 2.94     |
| c171140_g1           | IMPA2     | Inositol monophosphatase 2                                          | 2.00E-81     | 5.44    |         | 6.62     |          |         |          |          |

Table 1 Continued

| Transcript ID       | Gene name | Description                                           | Min. E value | D2-13°C | D14-9°C | D14-11°C | D14-13°C | D29-9°C | D29-11°C | D29-13°C |
|---------------------|-----------|-------------------------------------------------------|--------------|---------|---------|----------|----------|---------|----------|----------|
| c114902_g1          | NDK7      | Nucleoside diphosphate kinase 7                       | 1.00E-110    | 5.49    | 6.92    | 6.92     | 6.21     | 6.21    |          |          |
| Protein degradation |           |                                                       |              |         |         |          |          |         |          |          |
| c131456_g1          | GABT      | 4-aminobutyrate aminotransferase                      | 5.00E-172    | 4.74    | 6.70    | 6.70     | 5.88     | 5.88    |          |          |
| c17068_g1           | YME1      | ATP-dependent zinc metalloprotease YME1 homolog       | 0            | 6.19    | 8.30    | 8.30     | 5.16     | 5.16    |          |          |
| c285460_g1          | LONM      | Lon protease homolog                                  | 0            | 6.29    | 8.21    | 8.21     | 5.73     | 5.73    |          |          |
| c143333_g1          | PPCE      | Prolyl endopeptidase                                  | 0            | 4.32    | 6.83    | 6.83     | 5.26     | 5.26    |          |          |
| c139221_g3          | MASPI     | Mannan-binding lectin serine protease I               | 7.00E-131    |         |         |          | -1.13    | -1.13   |          |          |
| c141329_g1          | YM67      | Putative serine protease K12H4.7                      | 3.00E-97     | 6.38    | 7.62    | 7.62     |          |         |          |          |
| c157193_g1          | MASPI     | Mannan-binding lectin serine protease I               | 2.00E-33     |         |         |          |          |         | 2.39     |          |
| Redox regulation    |           |                                                       |              |         |         |          |          |         |          |          |
| c119300_g1          | DDH1      | 2-hydroxyacid dehydrogenase homolog I                 | 3.00E-77     | 8.18    | 8.65    | 8.65     | 7.09     | 7.09    |          |          |
| c55314_g1           | 6PGD      | 6-phosphogluconate dehydrogenase, decarboxylating     | 0            | 7.49    | 8.50    | 8.50     |          |         |          |          |
| c131734_g1          | ALDH2     | Aldehyde dehydrogenase                                | 0            | 8.28    | 8.66    | 8.66     | 6.36     | 6.36    |          |          |
| c146004_g1          | AL7A1     | Alpha-aminoadipic semialdehyde dehydrogenase          | 0            | 7.65    | 8.61    | 8.61     |          |         |          |          |
| c147930_g3          | AL8A1     | Aldehyde dehydrogenase family 8 member A1             | 8.00E-69     | -1.75   |         |          |          |         |          | -1.90    |
| c147930_g5          | AL8A1     | Aldehyde dehydrogenase family 8 member A1             | 0            | -1.88   |         |          |          |         |          |          |
| c160121_g1          | A16A1     | Aldehyde dehydrogenase family 16 member A1            | 5.00E-43     | 7.46    | 8.91    | 8.91     | 6.08     | 6.08    |          |          |
| c160121_g3          | BETB      | NAD/NADP-dependent betaine aldehyde dehydrogenase     | 3.00E-25     | 4.97    | 6.14    | 6.14     |          |         |          |          |
| c84031_g1           | MMSA      | Methylmalonate-semialdehyde dehydrogenase [acylating] | 0            | 7.66    | 8.50    | 8.50     |          |         |          |          |
| c85116_g1           | AL3A2     | Fatty aldehyde dehydrogenase                          | 2.00E-157    | 7.05    | 7.33    | 7.33     |          |         |          |          |
| c127863_g1          | GPDA      | Glycerol-3-phosphate dehydrogenase [NAD(+)]           | 1.00E-139    | 6.51    | 7.63    | 7.63     |          |         |          |          |
| c152592_g5          | GPDA      | Glycerol-3-phosphate dehydrogenase [NAD(+)]           | 5.00E-52     |         |         |          | -1.22    | -1.22   |          |          |
| c80177_g1           | GPDM      | Glycerol-3-phosphate dehydrogenase                    | 0            | 6.22    | 7.43    | 7.43     | 5.87     | 5.87    |          |          |
| c142412_g1          | IDH3B     | Probable isocitrate dehydrogenase [NAD] subunit beta  | 2.00E-124    | 6.77    | 7.69    | 7.69     | 6.52     | 6.52    |          |          |
| c142481_g1          | IDHP      | Isocitrate dehydrogenase [NADP]                       | 0            | 9.19    | 10.51   | 10.51    | 9.13     | 9.13    |          |          |
| c31815_g1           | IDH3A     | Probable isocitrate dehydrogenase [NAD] subunit alpha | 0            | 7.10    | 8.40    | 8.40     | 7.00     | 7.00    |          |          |
| c41378_g1           | IDH3G     | Isocitrate dehydrogenase [NAD] subunit gamma          | 1.00E-135    | 7.48    | 9.16    | 9.16     | 7.36     | 7.36    |          |          |
| c87013_g1           | IDHC      | Isocitrate dehydrogenase [NADP] cytoplasmic           | 3.00E-74     | 6.94    | 8.41    | 8.41     | 6.34     | 6.34    |          |          |
| c87013_g2           | IDHC      | Isocitrate dehydrogenase [NADP] cytoplasmic           | 5.00E-142    | 8.38    | 9.56    | 9.56     | 7.62     | 7.62    |          |          |
| c82288_g1           | MSRA      | Peptide methionine sulfoxide reductase MsrA           | 2.00E-67     | 5.97    | 6.18    | 6.18     |          |         |          |          |
| c101226_g1          | PRDX6     | Peroxiredoxin-6                                       | 1.00E-98     | 5.61    | 6.72    | 6.72     |          |         |          |          |
| c129981_g1          | PRDX1     | Peroxiredoxin I                                       | 3.00E-105    | 7.52    | 7.77    | 7.77     | 5.67     | 5.67    |          |          |

Table 1 Continued

| Transcript ID | Gene name | Description                                              | Min. E value | D2-13°C | D14-9°C | D14-11°C | D14-13°C | D29-9°C | D29-11°C | D29-13°C |
|---------------|-----------|----------------------------------------------------------|--------------|---------|---------|----------|----------|---------|----------|----------|
| c290185_g1    | PRDX4     | Peroxiredoxin-4                                          | 2.00E-106    | 5.94    | 6.43    |          |          |         |          |          |
| c60400_g1     | PRDX5     | Peroxiredoxin-5                                          | 3.00E-51     | 8.03    | 8.25    |          |          | 6.07    |          |          |
| c142815_g1    | PROD      | Proline dehydrogenase 1                                  | 2.00E-146    | 7.00    | 7.06    |          |          |         |          |          |
| c100326_g1    | NUJ1M     | NADH-ubiquinone oxidoreductase chain 1                   | 5.00E-52     | 11.08   | 10.43   | 9.69     |          | 11.44   | 9.37     | 9.49     |
| c104850_g1    | QOR       | Quinone oxidoreductase                                   | 5.00E-118    | 5.24    | 6.71    |          |          |         |          |          |
| c126329_g1    | NDUJ1     | NADH-ubiquinone oxidoreductase 75 kDa subunit            | 0            | 7.67    | 8.83    |          |          | 7.82    |          |          |
| c129954_g1    | NUJ5M     | NADH-ubiquinone oxidoreductase chain 5                   | 1.00E-56     | 10.32   | 9.45    | 8.57     |          | 10.42   | 7.88     | 8.23     |
| c136868_g1    | ETFD      | Electron transfer flavoprotein-ubiquinone oxidoreductase | 0            | 6.62    | 8.52    |          |          | 7.18    |          |          |
| c154835_g7    | SQRD      | Sulfide:quinone oxidoreductase                           | 0            |         |         |          |          | 0.91    | 1.11     |          |
| c133346_g1    | SODC      | Superoxide dismutase [Cu-Zn]                             | 1.00E-31     | 7.59    | 9.54    |          |          |         |          |          |
| c23313_g1     | SODM      | Superoxide dismutase [Mn]                                | 1.00E-100    | 6.70    | 8.13    |          |          | 5.83    |          |          |
| c236807_g1    | SODM      | Superoxide dismutase [Mn]                                | 3.00E-81     | 8.80    | 9.41    |          |          |         |          |          |
| c238857_g1    | SODC      | Superoxide dismutase [Cu-Zn]                             | 4.00E-30     | 7.51    | 9.09    |          |          |         |          |          |
| c106726_g1    | TRX1      | Thioredoxin-1                                            | 9.00E-36     | 7.33    | 8.32    |          |          | 6.36    |          |          |
| c108197_g1    | THIOM     | Thioredoxin                                              | 5.00E-39     | 5.80    | 7.60    |          |          | 5.84    |          |          |
| c109589_g1    | TRX1      | Thioredoxin-1                                            | 3.00E-28     | 8.36    | 7.07    |          |          | 5.49    |          |          |
| c124927_g1    | TMX1      | Thioredoxin-related transmembrane protein 1              | 6.00E-37     | 6.66    | 7.74    |          |          | 5.66    |          |          |
| c125785_g1    | TXND9     | Thioredoxin domain-containing protein 9                  | 1.00E-65     | 5.83    | 7.87    |          |          | 6.71    |          |          |
| c133642_g1    | PLP3B     | Thioredoxin domain-containing protein PLP3B              | 2.00E-27     |         | 6.35    |          |          | 5.05    |          |          |
| c133860_g1    | TXNLI     | Thioredoxin-like protein 1                               | 5.00E-87     | 5.25    | 6.76    |          |          | 4.44    |          |          |
| c286827_g1    | TXND5     | Thioredoxin domain-containing protein 5                  | 3.00E-94     | 4.88    | 6.59    |          |          |         |          |          |
| c7693_g1      | TMX2B     | Thioredoxin-related transmembrane protein 2-B            | 1.00E-57     | 5.04    | 6.77    |          |          | 5.33    |          |          |

Only contrasts in which differential expression was detected are included.



ing a generalized linear model with a quasi-binomial distribution to account for overdispersion (i.e., dispersion parameter  $> 1$ ; in this case, 3.54 and 2.00 for days 29 and 43, respectively). Back-transformed model estimates were used for plotting survival reaction norms. The assumptions of normality and homogeneity of variances were not violated except for a single datum from the low temperature treatment in the survival analyses, which we chose to retain.

## Results

### Differential gene expression between each temperature at each time point relative to the baseline

We raised laboratory-hatched cod larvae of wild origin at three temperatures (9°C, 11°C, and 13°C). We sampled a total of three larvae across two tank replicates at each temperature at 2, 14, and 29 days post hatch (dph), and an additional three larvae from the hatching tank at 0 dph (prior to transfer to temperature treatments) to serve as a baseline sample ( $n = 30$ ). Differential expression analysis of 51,075 *de novo* assembled transcripts revealed that genomic expression varied among time points and temperatures, with a time-by-temperature interaction (Fig. 2; Supplementary Material Table S1; for assembly details, see Oomen et al. 2022). At 2 dph, no difference in expression was observed at 9°C relative to the baseline sample taken prior to transfer (0 dph at 9°C), indicating a lack of response to transfer or major change in development over this brief time period. At the same time point, 10 and 3646 differentially expressed genes were detected at 11°C and 13°C, respectively, suggesting a minimal response to a short-term 2°C increase in temperature, but a comparatively substantive response to a short-term 4°C increase. At 14 dph, the number of differentially expressed genes increased to 94 at 9°C and 5121 at 11°C, while they declined to 294 at 13°C. At 29 dph, the greatest number of differentially expressed genes was observed at 9°C (4276), although many were still detected at higher temperatures (1229 and 1068 at 11°C and 13°C, respectively).

There was substantial overlap among temperatures at which genes were differentially expressed relative to the baseline. At 2 dph, all 10 genes that were differentially expressed at 11°C were also differentially expressed at 13°C (Fig. 3A), representing a common transcriptomic response to short-term warming. At 14 dph, most of the differentially expressed genes at 9°C were also detected at 11°C, and many of these were also detected at 13°C (Fig. 3B), perhaps representing a common developmental trajectory. Substantial numbers of differentially expressed genes were common between each set of tem-

peratures (617–673) and among all three temperatures (495) at 29 dph (Fig. 3C).

There were differences between time points in which genes were differentially expressed relative to the baseline. Relatively little overlap between 2 and 14 dph at 13°C (55/294 genes at 14 dph; Fig. 3E) suggests a major shift in transcription across this time period. Many new genes were differentially expressed at 29 dph relative to earlier time points, while some were also common to those detected at 14 dph (all temperatures) and 2 dph (13°C only) (Fig. 3D-F).

### Differential expression between temperatures

Direct tests for differential expression between temperatures within time points confirm that short-term exposure to 11°C (2°C increase) had little or no detectable impact on gene expression levels, while short-term exposure to 13°C (4°C increase) upregulated thousands of genes (Supplementary Table S1). After 2 weeks of exposure, 1507 and 2324 genes were upregulated at 11°C relative to 9°C and 13°C, respectively, while only four differentially expressed genes were detected between 9°C and 13°C. There were essentially no detectable differences in expression between temperatures after 4 weeks of exposure, suggesting that the responses to long-term exposure to different temperatures were similar.

### Differential expression over time

Direct tests for differential expression between time points within temperature treatments indicate a gradual shift in expression at 9°C, with a greater change in expression during the latter half of the experiment and the majority of differentially expressed genes detected only in pairwise tests between 0/2 and 29 dph (Table S1). The numbers of up- and downregulated genes both increased over time, but more genes were upregulated overall. A drastic shift in expression was observed between 2 and 14 dph at 11°C, with nearly twice as much upregulation as downregulation. This was followed primarily by downregulation between 14 and 29 dph, where the number of differentially expressed genes was about half as many as between the previous time points. At 13°C, expression largely decreased between 2 and 14 dph, then remained relatively constant between 14 and 29 dph.

### Temporal shift in common transcriptomic response

The differential expression analyses described herein specify a transcriptomic response characterized by vast upregulation that occurs earlier at higher temperatures,

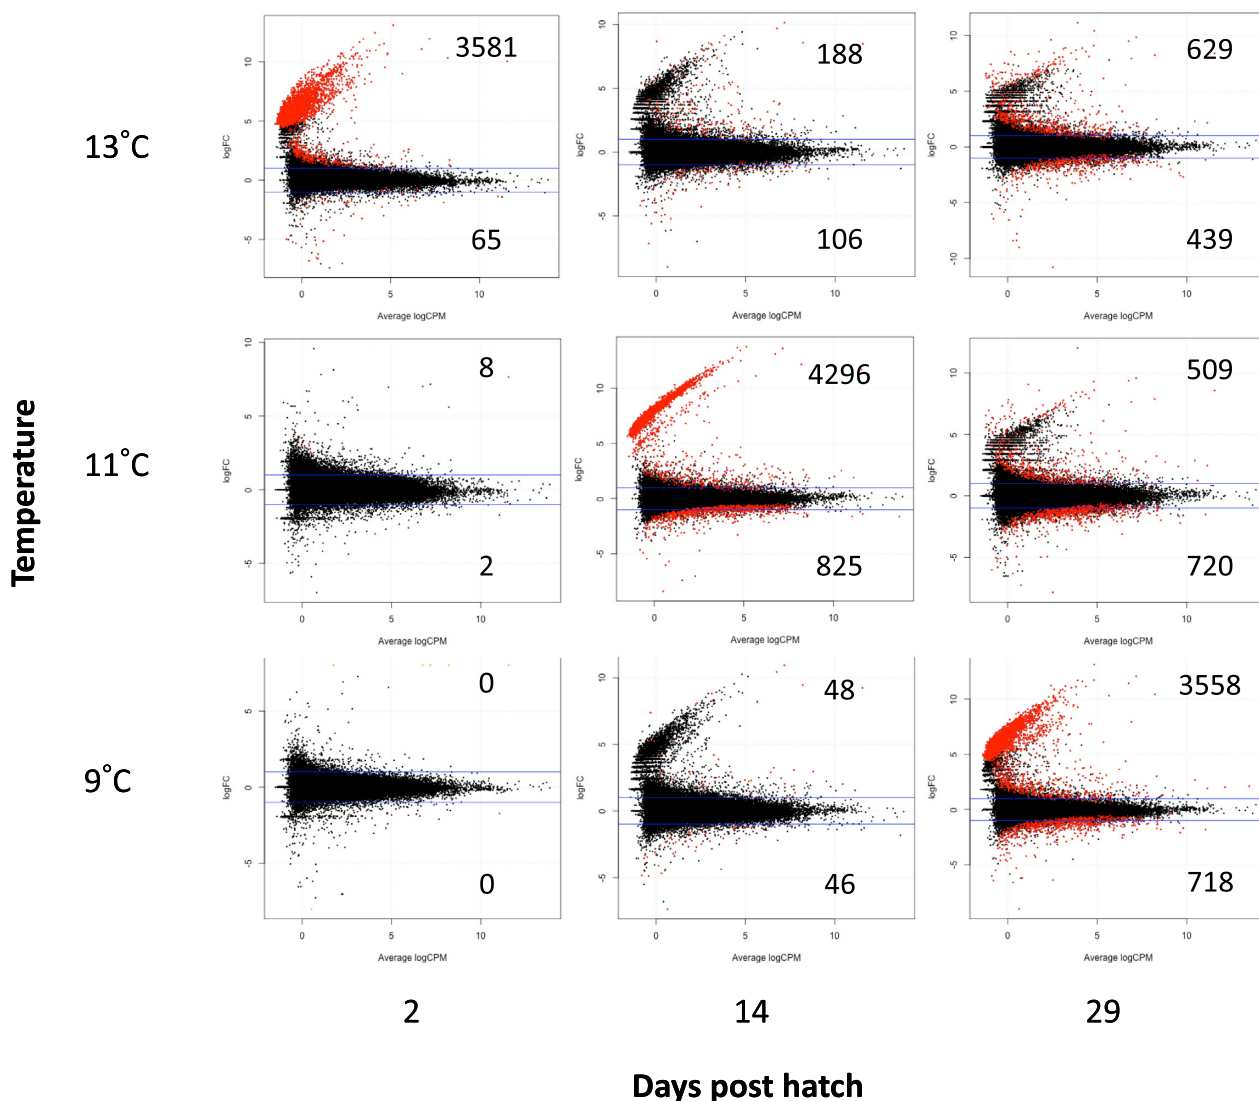

**Fig. 2** Differential gene expression of larval Atlantic cod (*G. morhua*) at ambient temperature, +2°C and +4°C. Log fold-change vs. average log counts-per-million of transcripts compared between each sample group (temperature × time) and the baseline sample (0 dph). The number of significantly up- and down-regulated transcripts are given in the upper and lower right-hand corners, respectively, and indicated in red based on a FDR-corrected *P*-value of 0.05. Blue lines represent positive and negative 2-fold differences in expression.

followed by downregulation of a portion of this response (except at 9°C, for which no time point subsequent to the peak of the response was available). This is exemplified by the greatest differences in gene expression relative to the baseline being observed at D2-13°C (i.e., 2 dph and 13°C), D14-11°C, and D29-9°C. The majority (2448) of these differentially expressed genes overlapped among all three responses, while 985 and 891 additionally overlapped between D29-9°C and D14-11°C, and D14-11°C and D2-13°C, respectively (Supplementary Fig. S1a). The GO terms associated with these differentially expressed genes overlapped even more, with 5902/8655 common among all three samples (Supplementary Fig. S1b). This suggests earlier onset of a common transcriptomic response as temper-

ature increases, along with some temperature- or time-specific gene expression.

Importantly, these temporal differences in gene expression levels do not correspond to differences in growing degree days. The magnitude of the common transcriptomic responses, in terms of both the numbers of differentially expressed genes and their log fold-changes, peaked at different degree days (Fig. 4), in addition to different experimental time points (Fig. 2).

### GO enrichment analysis

The number of significantly enriched GO terms differed between two enrichment methods. Enrichment with BiNGO (Maere et al. 2005) tended to be more sensitive than ClueGO (Bindea et al. 2009) when enrich-

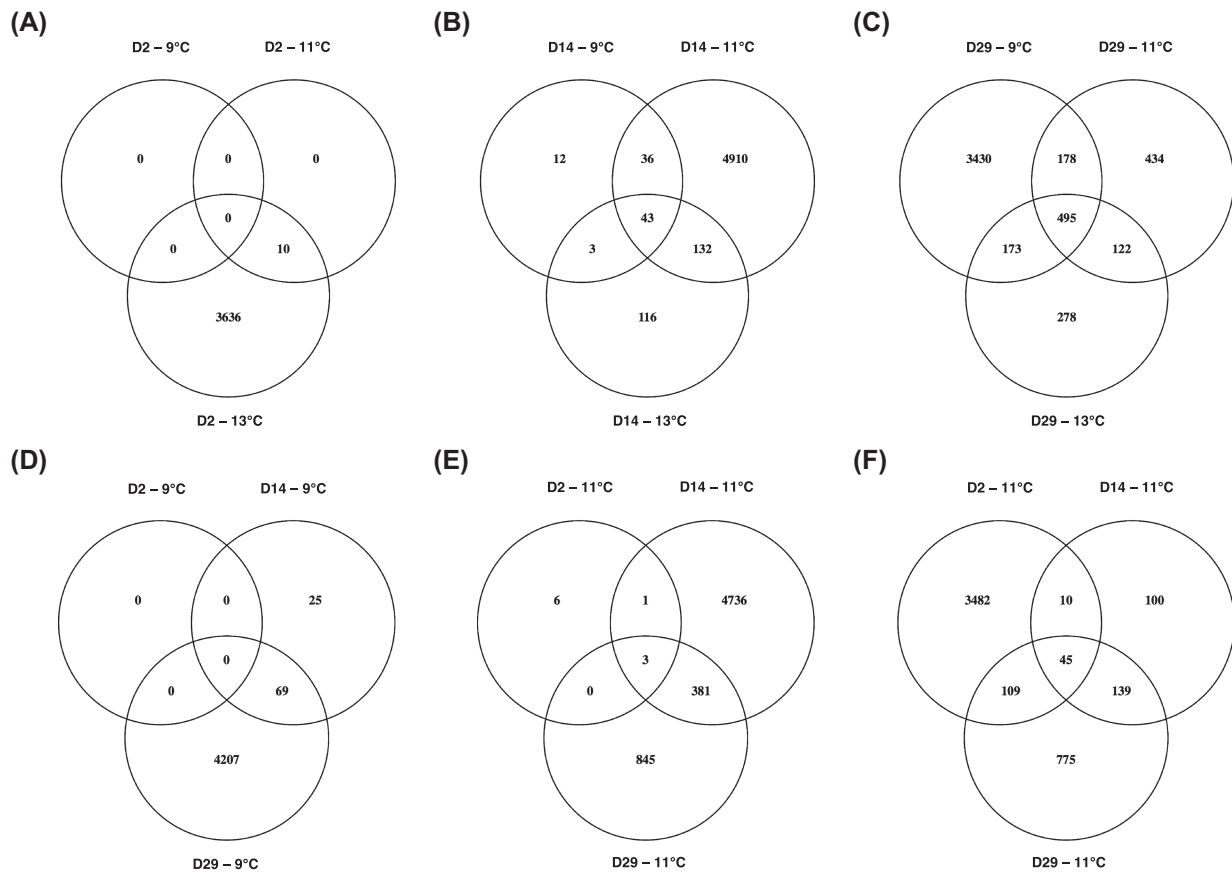

**Fig. 3** Overlap of differentially expressed genes. Venn diagrams depicting the overlap of differentially expressed (FDR < 0.05) genes among temperature treatments at (A) 2 dph, (B) 14 dph, and (C) 29 dph, and among time points at (D) 9°C, (E) 11°C, and (F) 13°C.

ment was generally low (e.g., < 50 BiNGO terms), but the opposite was true when enrichment was high (Supplementary Table S2). Yet, these methods showed similar temperature trends at each time point, both in terms of the numbers of enriched GO terms and their associated functions (Supplementary Table S2).

After 2 days of exposure, the few upregulated genes at 11°C were enriched for cellular respiration according to BinGO, as were the genes upregulated at 9°C after 14 days of exposure (Supplementary data 1).

Genes that were upregulated during the peak of the common transcriptomic response (i.e., at D2-13°C, D14-11°C, and D29-9°C) were enriched for 305,334, and 307 (BiNGO) and 1545, 1756, and 1595 (ClueGO) GO terms, respectively (Supplementary Table S2). Most of the BiNGO-enriched terms were associated with development and oogenesis, cellular respiration and metabolism (particularly lipid metabolism), gene expression regulation, cell cycle activity, and protein folding, metabolism, and localization (Supplementary data 1). Within this common response, the number of terms related to the cell cycle decreased with temperature, whereas the number of terms related to energy and protein metabolism increased with temperature. The

same ClueGO-enriched GO category was the largest category at D2-13°C, D14-11°C, and D29-9°C, consisting of 141–198 enriched GO terms (Fig. 5). Most of these were involved in cell cycle regulation (e.g., cell cycle checkpoint [GO: 75], regulation of cell cycle [GO: 51,726]), including cell cycle arrest (GO: 7050,71,156) and protein metabolism (e.g., protein catabolic process [GO: 30,163], proteolysis [GO: 6508]). Other GO terms within this upregulated enrichment group were associated with a response to hypoxia (GO: 36293, 36294, 61418, 70482, 71453, 71456), antigen presentation (GO: 2474, 19884, 48002), and autophagy (GO: 6914, 10506).

Among the next largest GO enrichment groups observed at the peak of the common transcriptomic response were those dominated by protein biosynthesis, metabolism, transport and localization, energy metabolism, including cellular respiration, chromatin and histone modification, DNA repair, regulation of transcription and translation, responses to hormonal stimuli, cellular/mitochondrial organization and autophagy/mitophagy, and adaptive immune and viral responses (Fig. 5). These GO groups were represented by similar numbers and types of GO terms at D2-13°C, D14-11°C, and D29-9°C, although there were fewer

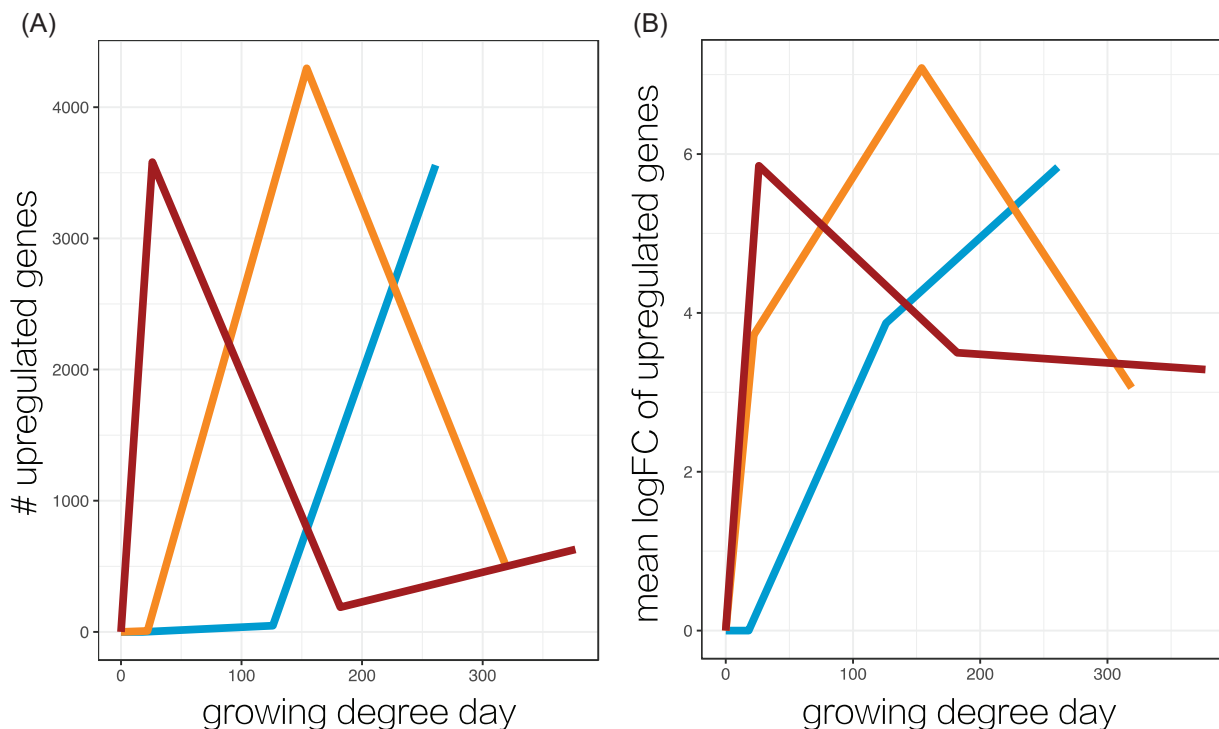

**Fig. 4** Gene upregulation by growing degree day. (A) Number of upregulated genes and (B) mean logFC of upregulated genes relative to the baseline sample (0 dph), plotted according to the growing degree day (i.e., 1 degree  $\times$  1 day) at which the sample was collected.

terms associated with metabolic processes at D29-9°C. Further, a large GO group associated with brain and nervous system development at D29-9°C (25 terms, Group 194) was absent from the warmer temperatures (although 4 [D2-13°C] and 6 [D14-11°C] of these terms were enriched in clusters related to other processes), and a group of heart developmental processes was larger at D29-9°C (20 terms) compared to D2-13°C and D14-11°C (8 terms each).

Among these commonly upregulated responses at D2-13°C, D14-11°C, and D29-9°C, those enriched GO terms unique to D2-13°C included more terms related to metabolism and energy production, whereas those unique to D29-9°C included more terms related to development, cell cycle processes, and the immune system (Supplementary data 2). Those enriched GO terms unique to D14-11°C contained intermediate amounts of metabolic and cell cycle-related terms relative to the other treatments. The numbers of enriched GO terms for upregulated genes associated with the endoplasmic-reticulum-associated protein degradation (ERAD) pathway (11, 15, and 22) and apoptotic signalling pathways (10, 16, and 22) increased with temperature for D29-9°C, D14-11°C, and D2-13°C, respectively. Enriched GO terms specifically related to oxidative stress were only present at D2-13°C (4) and D14-11°C (6). Genes upregulated at D2-13°C, D14-11°C,

and D29-9°C were characterized by similar numbers of enriched GO terms related to cell cycle arrest (2–3), neuron death (3–4), cellular responses to heat (2–5), hypoxia (7–8), and stress in general (9–11). In contrast, the numbers of enriched GO terms explicitly associated with the immune system (31, 25, and 19) and the Wnt signalling pathways (14, 9, and 3) decreased with temperature at D29-9°C, D14-11°C, and D2-13°C, respectively.

Upregulated genes at D14-13°C, D29-11°C, and D29-13°C (i.e., time points following the peak of the response at each temperature) were primarily enriched for developmental and immune-related processes (Supplementary data 1 and 2). At day 29, these included BinGO-enriched terms related to heart development (e.g., GO: 55,009), the acute inflammatory response (GO: 2541), and the regulation of a suite of interleukins (GO: 32653, 32673, 32674, 32693, 32714, 32753). ClueGO-enriched terms were mainly associated with brain (GO: 21762, 30901) and heart (11°C only) development.

Downregulated genes at D2-11°C and D2-13°C were largely enriched for light perception, while at D14-9°C they were primarily enriched for cardiac development and muscle contraction (Supplementary data 3). Processes related to development and visual perception continued to be the most commonly enriched processes

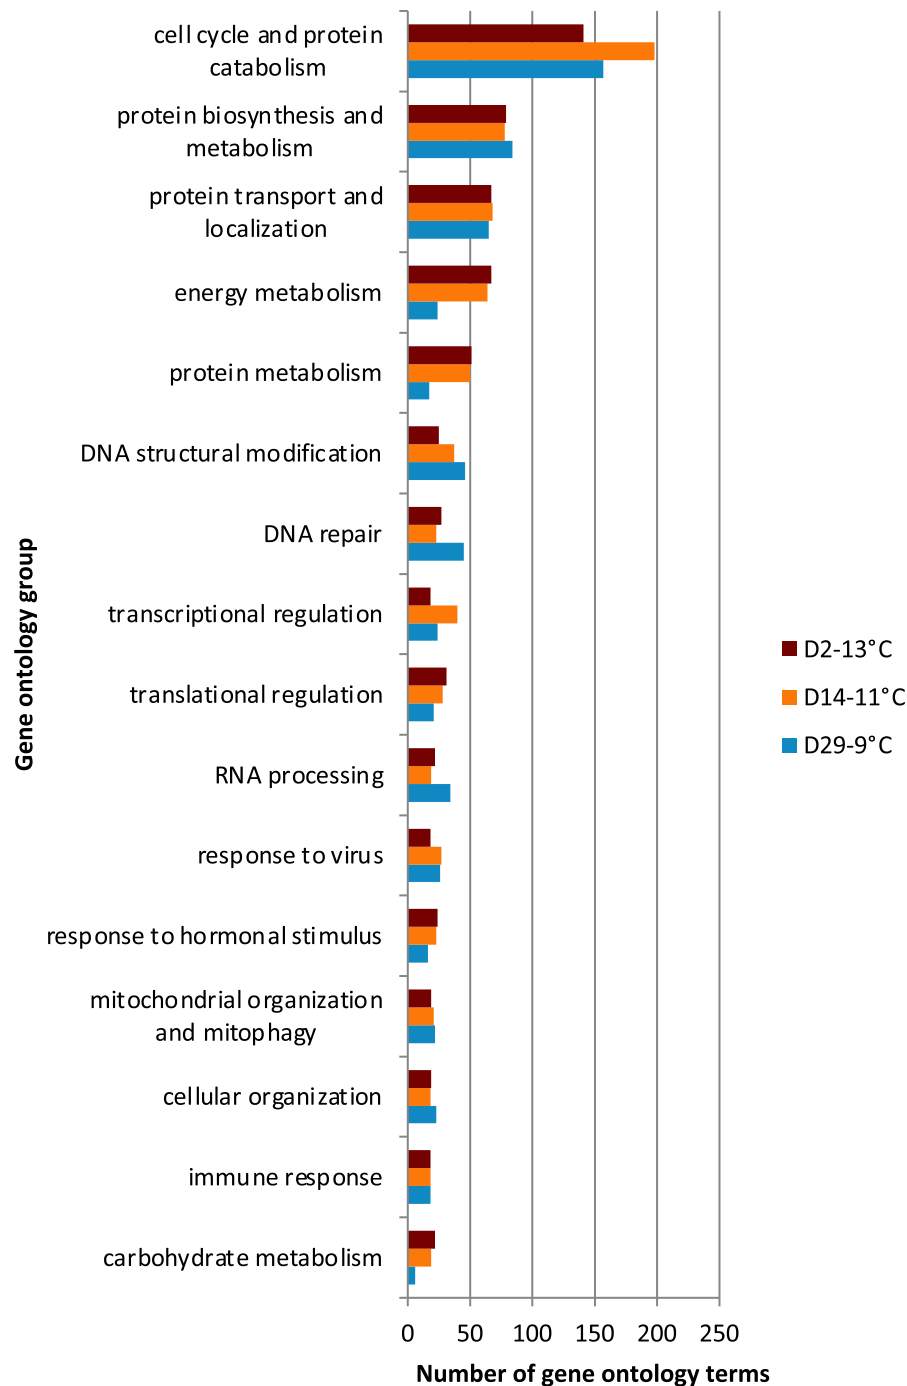

**Fig. 5** Biological processes represented by the GO groups collectively containing the greatest number of enriched (FDR <0.05) GO terms based on ClueGO analysis of the Trinity transcripts upregulated (FDR <0.05) at D2-13°C, D14-11°C, and D29-9°C. The GO groups are manually defined across separate analyses for each sample based on a high degree of overlap among terms (see Supplementary Fig. S2).

among downregulated genes in all treatments for the duration of the experiment (Supplementary data 3 and 4).

### Minimum stress proteome

Of the 44 genes that comprise the minimum stress proteome (Kültz 2005), 40 were detected in our *de*

*novo* transcriptome annotation database. Thirty-three of these were differentially expressed in at least two of the three temperature treatments (at D2-13°C, D14-11°C, and/or D29-9°C), with the fewest detected at D29-9°C (Table 1). Many genes were represented by multiple transcripts and most were upregulated across treatments.

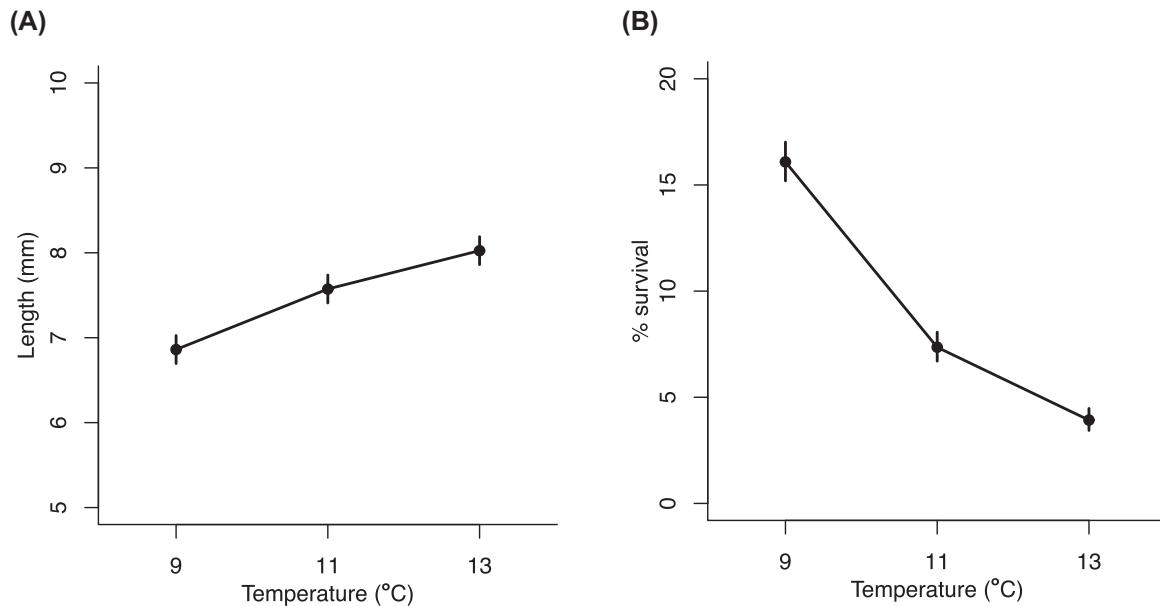

**Fig. 6** Thermal reaction norms for larval Skagerrak Atlantic cod. (A) Length and (B) survival at 29 dph.

### Growth and survival reaction norms

Thermal reaction norms at 29 dph show that growth increased with temperature ( $F_{2,87} = 12.7$ ,  $P < 0.001$ ; Fig. 6A) while survival decreased ( $P < 0.001$ ; Fig. 6B). The magnitudes of these effects were substantial: a 117% increase in growth and a 75% reduction in survival from 9°C to 13°C. The negative effect of increased temperature on survival was also apparent at 43 dph (79% reduction from 9°C to 13°C;  $P < 0.001$ ; Supplementary Fig. S3).

### Discussion

Here we show that warmer temperatures accelerate the onset of a broad change in transcription in larval Atlantic cod while increasing growth and mortality. Aside from temporal differences, a similar pattern of gene transcription consistent with a severe cellular stress response was observed at all temperatures by the end of the larval stage, including the local ambient temperature (9°C) that has already risen an average of 1°C since the late 1980s (Barceló *et al.* 2016; Supplementary Fig. S4) and projected temperatures under future warming scenarios of +2°C (11°C) and +4°C (13°C) (IPCC 2013). Therefore, current and future sea temperatures in the Skagerrak Sea are above the threshold for thermal stress when larvae are exposed chronically in a laboratory setting. Our findings suggest that recent climate change might already be negatively impacting the productivity of the depleted Skagerrak cod populations and that future climate change is expected to exacerbate these effects in a nonlinear manner.

### Transcriptomic response to warming

Warming generally increases metabolic energy requirements and oxygen consumption (Fry and Hart 1948). Indeed, transcripts involved in cellular respiration were the earliest to be upregulated at all temperatures in our experiment, and enrichment of this process increased with temperature at the peak of the common transcriptomic response. Sufficient warming causes a build-up of oxygen metabolism byproducts, reactive oxygen species, that damages complex molecules and cellular structures (Abele and Puntarulo 2004). Damage to macromolecules activates the highly conserved cellular stress response, the core components of which include (1) the protection of macromolecules (e.g., through chaperoning of misfolded or damaged proteins and DNA repair mechanisms), (2) regulation of the cell cycle to temporarily arrest cell proliferation, (3) metabolic shifts and, if the stress is sufficiently severe, and (4) programmed death (apoptosis) and removal of terminally damaged cells (Kültz 2005). Overall, these processes dominate the common transcriptome we observed. The enrichment of GO terms specific to stress in general and the response to heat are consistent with a broad and severe thermal stress response at all temperatures in the present study. The enrichment of GO terms related to hypoxia (oxygen deficiency) is also consistent with warming-related stress, as the decreased oxygen solubility with temperature coupled with increased oxygen consumption widens the gap between supply and demand. Our inference of a stress response is further supported by the upregulation of 33 of the 44 genes comprising the minimum stress proteome of all organ-

isms (Kültz 2005). A similar number (31 of 44) of these stress genes were upregulated in yeast exposed to diverse stressors (Gasch et al. 2000). The lack of the full set in our experiment might be attributable to incomplete assembly, constitutive expression, or regulation by processes other than transcription (e.g., post-translational modification or protein turnover).

The majority of differentially expressed transcripts in our experiment were upregulated relative to the baseline, similar to that observed in larval zebrafish following acute exposure to heat (Long et al. 2012). High enrichment for upregulation of protein biosynthesis, regulation of transcription and translation, and RNA processing likewise suggest activation of a large suite of cellular machinery that is likely costly to maintain (Wagner 2005).

In addition to earlier onset of the stress response at higher temperatures, there is some evidence that the severity of the stress response increased with temperature. Greater enrichment for upregulated genes involved in oxidative stress and protein metabolism, particularly the ERAD pathway, suggests a greater build-up of reactive oxygen species and damaged proteins at higher temperatures (Slimen et al. 2014). The associated increase in apoptotic signalling pathways (including those specifically induced by endoplasmic reticulum stress) is consistent with more prevalent terminal cell damage at higher temperatures. Similarly, genes involved in oxidative stress-induced neuron death were upregulated only at the warmer temperatures. Greater enrichment of upregulated genes related to carbohydrate metabolism and energy production at 11°C and 13°C might represent a larger metabolic shift in response to stress, a thermodynamic consequence related to the positive relationship between temperature and metabolism, or both.

Developmental transcription also differed markedly between temperatures. Many processes related to visual perception and development were commonly downregulated over time, consistent with the completion of some organ development and optical system formation. However, the lack of processes related to nervous system and heart development among genes upregulated at warmer temperatures suggests a disruption of neural and cardiac development. The reduction in enrichment of upregulated genes involved in the Wnt signalling pathways at warmer temperatures is also consistent with altered developmental progress. These highly conserved and strictly controlled pathways perform critical functions in cell proliferation and differentiation in developing tissues and the immune system, and their dysregulation is implicated in developmental abnormalities and malignancies (Staal et al. 2008). Coral (*A. palmata*; Polato et al. 2013) and zebrafish (Long et al. 2013) lar-

vae upregulate genes involved in Wnt pathways in response to heat and cold stress, respectively, suggesting that Wnt-associated genes might be widely vulnerable to thermal disruptions.

### Earlier onset of the transcriptomic response

We found that the transcriptomic stress response occurred earlier at higher temperatures, to an even greater extent than can be accounted for by developmental time (i.e., growing degree days). The growing degree day metric is widely applied to developing ectotherms, based on the essentially linear relationship between acclimation temperature and metabolic rate across the majority of the thermal window (Neuheimer and Taggart 2007). Because the growing degree day relationship follows a normal developmental rate, temporal deviations in transcription from this trend are consistent with thermal effects on gene expression that are in addition to potential effects of temperature-mediated development. Further, the differences in growth rates among temperatures in our experiment are small compared to the differences in the timing of transcription. However, the relationships between thermal rates at different levels of biological organization are unclear and likely extremely complex, making comparisons difficult (Chau-Berlinck et al. 2004). Nonetheless, acceleration of normal developmental transcription such as that documented in coral larvae over 72 h of exposure to just 2°C of warming (Polato et al. 2013), also has potential fitness consequences.

### A potential mechanistic link to fitness

Thermal stress depletes energy reserves such as lipid stores (Klepsatel et al. 2016), and the molecular response to thermal stress is energetically costly in particular. For example, continued overexpression of HSPs is known to negatively impact growth rate and fertility (Tomanek 2010). Such exhausting expression might help to explain why performance and its upper thermal range decrease with increasing duration of exposure to even nonlethal temperatures (Schulte et al. 2011). This hypothesis is supported by models, based on thermal performance curves for ingestion rate, that incorporate the energetic costs associated with producing heat shock proteins in Tobacco hornworm (*Manduca sexta*) larvae (Kingsolver and Woods 2016). It is reasonable to infer that the upregulation of thousands of transcripts that we observed in response to warming in larval cod might act as a similar energetic drain, as gene expression is costly (Wagner 2005).

Faster growth, as observed at higher temperatures in the present study and in marine fish larvae generally (Pepin 1991), can improve fitness by reducing

the duration of the vulnerable larval stage (Anderson 1988). Yet, fast growth can be suboptimal due to conflicts in energy allocation (Billerbeck et al. 2001). If fast-growing fish are unable to sufficiently reallocate energy away from growth in response to stress, the high energetic demands of the molecular stress response might exceed energy availability. Accordingly, mortality increased with temperature in our experiment. Thus, we hypothesize that the energetically costly stress response, coupled with increased growth rate at warmer temperatures, leads to faster depletion of energy reserves and increased risk of mortality in larval cod. Such energetic limitations are likely to be exacerbated in the wild, where food is limited compared to the laboratory environment, especially at warmer temperatures (Rogers et al. 2011).

### Future research directions

The ambient temperature in our experiment is likely to be experienced during the latter, warmer part of the regional spawning period (January–May) in a relatively southern part of the distribution of this cold-water adapted species. Additional experiments are needed to characterize larval developmental expression at colder temperatures that are likely to be experienced earlier in the spawning season and farther north. Further, thermal responses can vary among populations adapted to different thermal regimes (Oomen and Hutchings 2015a). Genetic variation in thermal plasticity has been shown for growth and survival of cod larvae in the northeast Atlantic (Oomen and Hutchings 2015b, 2016). Therefore, further research is needed to determine how the transcriptomic response observed in our study might differ between cod populations. Measures of protein levels would help to further elucidate the mechanistic link between gene transcription and fitness in thermal responses, as would measures of energy usage (e.g., oxygen consumption, lipid storage levels).

### Potential implications

As sea surface temperatures continue to rise over the next century, reduced fitness of Atlantic cod larvae might lead to population declines in this ecologically and socioeconomically important species. Indeed, the physiological consequences of 2–4°C of warming observed in the present study contribute to a mechanistic understanding of the negative association between temperature and recruitment for relatively warm-water cod populations inhabiting regions such as coastal Skagerrak (Rogers and Stenseth 2017) and the North Sea (O'Brien et al. 2000). Accelerated development at warmer temperatures might lead to reduced population connectivity by shortening the duration of the pelagic

larval phase, thereby limiting dispersal distance. Rapid adaptation to warmer temperatures might also occur given the apparently strong selection pressure observed in the present study, but only if heritable variation in thermal responses exists (Nussey et al. 2005).

### Author contributions

R.A.O. and J.A.H. designed the study. J.A.H., H.K., and N.C.S. contributed funds. E.M.O. and H.K. managed wild fish collection and supervised the fish rearing experiment. R.A.O. conducted the fish rearing experiment, molecular laboratory work, and data analyses. S.J. managed the RNA sequencing. R.A.O., S.J., and J.A.H. interpreted the results. R.A.O. wrote the manuscript with help from all the authors. All authors read and approved the manuscript. R.A.O. approved the final submission on behalf of J.A.H.

### Acknowledgments

We acknowledge the contributions of the staff and students at the *Institute of Marine Research, Flødevigen* for their facilities, technical assistance, and additional support during the experiment, especially P. Baardsen, S. Stiansen, R. Johansen, H. Sannaes, K. Halvorsen, and T. Sjørdalen. We are grateful to the Centre for Ecological and Evolutionary Synthesis (CEES) for technical and administrative assistance and to M. Solbakken, O.K. Tørresen, and M.H.S. Hansen for enabling the molecular and bioinformatics work. The transcriptome sequencing was carried out at the Norwegian Sequencing Centre (NSC; <http://www.sequencing.uio.no>), University of Oslo. All computational work was performed on the Abel Supercomputing Cluster (Norwegian meta-center for High Performance Computing (NOTUR) and the University of Oslo) operated by the Research Computing Services group at USIT, the University of Oslo IT-department (<http://www.hpc.uio.no/>). Thanks to P. Bentzen, C. Herbig, and M. Johnston for helpful comments and discussion.

### Funding

This work was supported Canada's Natural Sciences and Engineering Research Council through a Discovery Grant to J.A.H. and a Canada Graduate Scholarship and Michael Smith Foreign Study Supplement to R.A.O., the Research Council of Norway to J.A.H., Interreg IV (MarGen) to H.K., a Killam Predoctoral Scholarship and Nova Scotia Graduate Scholarship to R.A.O., and the Centre for Ecological and Evolutionary Synthesis.

### Supplementary data

Supplementary data available at *ICB* online.



## Conflict of Interest

The authors have no conflicts of interest to declare.

## Data availability statement

The genomic data underlying this article will be made available in the European Nucleotide Archive, where they will be associated with this publication. They will also be made available upon request.

## References

- Abele D, Puntarulo S. 2004. Formation of reactive species and induction of antioxidant defence systems in polar and temperate marine invertebrates and fish. *Comp Biochem Physiol A Mol Integr Physiol* 138:405–15.
- Abele D. 2012. Temperature adaptation in changing climate: marine fish and invertebrates. In: Storey KB, Tanino S, Tanino KK, editors. *Temperature adaptation in a changing climate: nature at risk*, Wallingford: Centre for Agriculture and Biosciences International. p. 67–79.
- Abramoff MD, Magalhães PJ, Ram SJ. 2004. Image processing with ImageJ. *Biophotonics Int* 11:36–42.
- Anderson JT. 1988. A review of size dependent survival during pre-recruit stages of fishes in relation to recruitment. *J Northw Atl Fish Sci* 8:55–66.
- Barceló C, Ciannelli L, Olsen EM, Johannessen T, Knutsen H. 2016. Eight decades of sampling reveal a contemporary novel fish assemblage in coastal nursery habitats. *Global Change Biol* 22:1155–67.
- Billerbeck JM, Lankford TE, Conover DO. 2001. Evolution of intrinsic growth and energy acquisition rates. I. trade-offs with swimming performance in *Menidia menidia*. *Evolution* 55:1863–72.
- Bindea G, Mlecnik B, Hackl H, Charoentong P, Tosolini M, Kirilovsky A, Fridman W-H, Pagès F, Trajanoski Z, Galon J. 2009. ClueGO: a Cytoscape plug-in to decipher functionally grouped gene ontology and pathway annotation networks. *Bioinformatics* 25:1091–93.
- Chau-Berlinck JG, Navas CA, Monteiro LHA, Bicudo JEPW. 2004. Temperature effects on a whole metabolic reaction cannot be inferred from its components. *Proc R Soc Lond B Biol Sci* 271:1415–19.
- Chen B, Feder ME, Kang L. 2018. Evolution of heat-shock protein expression underlying adaptive responses to environmental stress. *Mol Ecol* 27:3040–54.
- Clark TD, Sandblom E, Jutfelt F. 2013. Aerobic scope measurements of fishes in an era of climate change: respirometry, relevance and recommendations. *J Exp Biol* 216:2771–82.
- Clarke A, Fraser KPP. 2004. Why does metabolism scale with temperature? *Funct Ecol* 18:243–51.
- Fry FEJ, Hart JS. 1948. Cruising speed of goldfish in relation to water temperature. *J Fish Res Board Can* 7b:169–75.
- Gasch AP, Spellman PT, Kao CM, Carmel-Harel O, Eisen MB, Storz G, Botstein D, Brown PO. 2000. Genomic expression programs in the response of yeast cells to environmental changes. *Mol Biol Cell* 11:4241–57.
- Hulsen T, de Vlieg J, Alkema W. 2008. BioVenn—a web application for the comparison and visualization of biological lists using area-proportional Venn diagrams. *BMC Genomics* 9:488.
- Hutchings JA, Swain DP, Rowe S, Eddington JD, Puvanendran V, Brown JA. 2007. Genetic variation in life-history reaction norms in a marine fish. *Proc Biol Sci* 274:1693–99.
- IPCC. 2013. IPCC, 2013: summary for policymakers. In: Stocker TF, Qin D, Plattner G-K, Tignor M, Allen SK, Boschung J, Nauels A, Xia Y, Bex V, Midgley PM, editors. *Climate Change 2013: The Physical Science Basis. Contribution of Working Group I to the Fifth Assessment Report of the Intergovernmental Panel on Climate Change* Cambridge, New York (NY) : Cambridge University Press.
- Kingsolver JG, Woods HA. 2016. Beyond thermal performance curves: modeling time-dependent effects of thermal stress on ectotherm growth rates. *Am Nat* 187:283–94.
- Klepsatel P, Gáliková M, Xu Y, Kühnlein RP. 2016. Thermal stress depletes energy reserves in *Drosophila*. *Sci Rep* 6:33667.
- Kültz D. 2005. Molecular and evolutionary basis of the cellular stress response. *Annu Rev Physiol* 67:225–57.
- Logan CA, Buckley BA. 2015. Transcriptomic responses to environmental temperature in eurythermal and stenothermal fishes. *J Exp Biol* 218:1915–24.
- Long Y, Li L, Li Q, He X, Cui Z. 2012. Transcriptomic characterization of temperature stress responses in larval zebrafish. *PLoS One* 7:e37209.
- Long Y, Song G, Yan J, He X, Li Q, Cui Z. 2013. Transcriptomic characterization of cold acclimation in larval zebrafish. *BMC Genomics* 14:612.
- Maere S, Heymans K, Kuiper M. 2005. BiNGO: a Cytoscape plugin to assess overrepresentation of gene ontology categories in biological networks. *Bioinformatics* 21:3448–49.
- Meier K, Hansen MM, Normandeau E, Mensberg K-LD, Frydenberg J, Larsen PF, Bekkevold D, Bernatchez L. 2014. Local adaptation at the transcriptome level in brown trout: evidence from early life history temperature genomic reaction norms. *PLoS One* 9:e85171.
- Moyano M, Candebat C, Ruhbaum Y, Alvarez-Fernandez S, Claireaux G, Zambonino-Infante J-L, Peck MA. 2017. Effects of warming rate, acclimation temperature and ontogeny on the critical thermal maximum of temperate marine fish larvae. *PLoS One* 12:e0179928.
- Neuheimer AB, Taggart CT. 2007. The growing degree-day and fish size-at-age: the overlooked metric. *Can J Fish Aquat Sci* 64:375–85.
- Nussey DH, Postma E, Gienapp P, Visser ME. 2005. Selection on heritable phenotypic plasticity in a wild bird population. *Science* 310:304–06.
- O'Brien CM, Fox CJ, Planque B, Casey J. 2000. Climate variability and North Sea cod. *Nature* 404:142–43.
- Oomen RA, Hutchings JA. 2015. Genetic variability in reaction norms in fishes. *Environ Rev* 23:353–66.
- Oomen RA, Hutchings JA. 2015. Variation in spawning time promotes genetic variability in population responses to environmental change in a marine fish. *Conserv Physiol* 3:cov027.
- Oomen RA, Hutchings JA. 2016. Genetic variation in plasticity of life-history traits between Atlantic cod (*Gadus morhua*) populations exposed to contrasting thermal regimes. *Can J Zool* 94:257–64.

- Oomen RA, Hutchings JA. 2017. Transcriptomic responses to environmental change in fishes: insights from RNA sequencing. *FACETS* 2:610–41.
- Oomen RA, Knutsen H, Olsen EM, Jentoft S, Stenseth NC, Hutchings JA. 2022. Comparison of *de novo* and reference genome-based transcriptome assembly pipelines for differential expression analysis of RNA sequencing data. *bioRxiv*. 2022.08.20.504634 <https://doi.org/10.1101/2022.08.20.504634> <https://doi.org/10.1101/2022.08.20.504634>
- Pepin P. 1991. Effect of temperature and size on development, mortality, and survival rates of the pelagic early life history stages of marine fish. *Can J Fish Aquat Sci* 48:503–18.
- Polato NR, Altman NS, Baums IB. 2013. Variation in the transcriptional response of threatened coral larvae to elevated temperatures. *Mol Ecol* 22:1366–82.
- Pörtner HO, Farrell AP. 2008. Physiology and climate change. *Science* 322:690–2.
- Pörtner HO. 2002. Climate variations and the physiological basis of temperature dependent biogeography: systemic to molecular hierarchy of thermal tolerance in animals. *Comp Biochem Physiol A Mol Integr Physiol* 132:739–61.
- R Core Team. 2014. R: a language and environment for statistical computing. R Foundation for Statistical Computing Vienna Austria <https://www.R-project.org/>
- Robinson MD, McCarthy DJ, Smyth GK. 2010. edgeR: a Bioconductor package for differential expression analysis of digital gene expression data. *Bioinformatics* 26 139–140
- Rogers LA, Stenseth NC. 2017. Fine-scale population dynamics in a marine fish species inferred from dynamic state-space models. *J Anim Ecol* 86:888–98.
- Rogers LA, Stige LC, Olsen EM, Knutsen H, Chan K-S, Stenseth NC. 2011. Climate and population density drive changes in cod body size throughout a century on the Norwegian coast. *Proc Natl Acad Sci* 108:1961–66.
- Roney NE, Oomen RA, Knutsen H, Olsen EM, Hutchings JA. 2018. Temporal variability in offspring quality and individual reproductive output in a broadcast-spawning marine fish. *ICES J Mar Sci* 75:1353–61.
- Schulte PM, Healy TM, Fangue NA. 2011. Thermal performance curves, phenotypic plasticity, and the time scales of temperature exposure. *Integr Comp Biol* 51: 691–02.
- Schulte PM. 2014. What is environmental stress? Insights from fish living in a variable environment. *J Exp Biol* 217: 23–34.
- Scott GR, Johnston IA. 2012. Temperature during embryonic development has persistent effects on thermal acclimation capacity in zebrafish. *Proc Natl Acad Sci* 109: 14247–52.
- Shannon P, Markiel A, Ozier O, Baliga NS, Wang JT, Ramage D, Amin N, Schwikowski B, Ideker T. 2003. Cytoscape: a software environment for integrated models of biomolecular interaction networks. *Genome Res* 13: 2498–504.
- Slimen IB, Najar T, Ghram A, Dabbebi H, Ben Mrad M, Abdrabbah M. 2014. Reactive oxygen species, heat stress and oxidative-induced mitochondrial damage. A review. *Int J Hyperthermia* 30:513–23.
- Staal FJT, Luis TC, Tiemessen MM. 2008. WNT signalling in the immune system: WNT is spreading its wings. *Nat Rev Immunol* 8:581–93.
- Tomanek L. 2010. Variation in the heat shock response and its implication for predicting the effect of global climate change on species' biogeographical distribution ranges and metabolic costs. *J Exp Biol* 213:971–79.
- Wagner A. 2005. Energy constraints on the evolution of gene expression. *Mol Biol Evol* 22: 1365–74.
